# Supplementary material
Source: PubMed Central journal article supplement (PMC3607268)

Supplementary Fig. S1. Correlation between hTERT mRNA expression and TA by linear regression.

Supplementary Fig. S2. Relation of telomere-associated parameters and age. Association between age and hTERT mRNA expression (A) as well as TA (B) was established by linear regression analyses. Telomere lengths were analyzed in the patient cohorts  $\geq 60$  years using Student's *t*-test (C). Correlation between age and telomere length are shown for TA-positive (+) and TA-negative (-) GBM subgroups as indicated (D).

Fig.S1

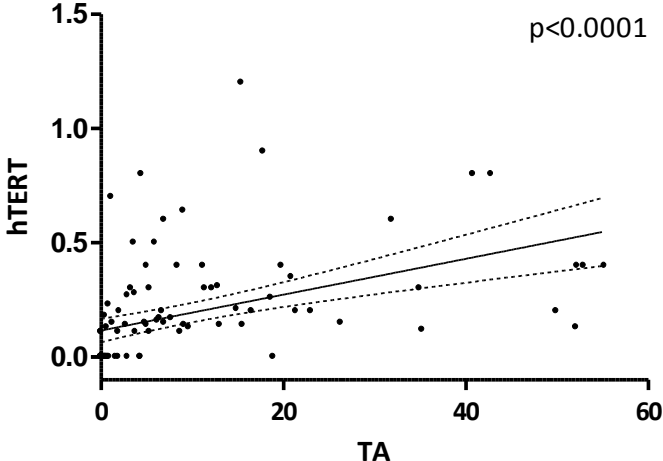

Fig.S2

A

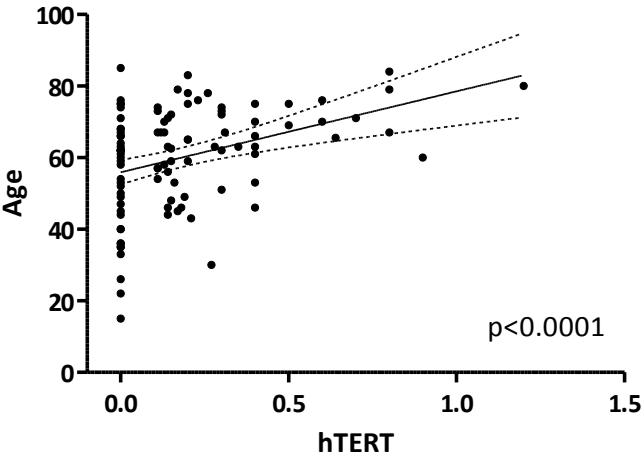

B

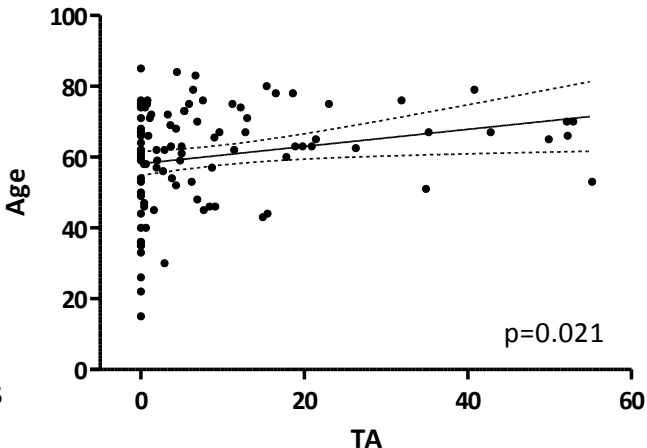

C

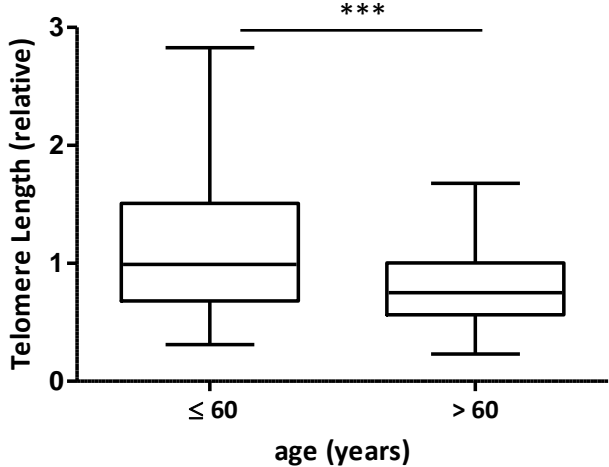

D

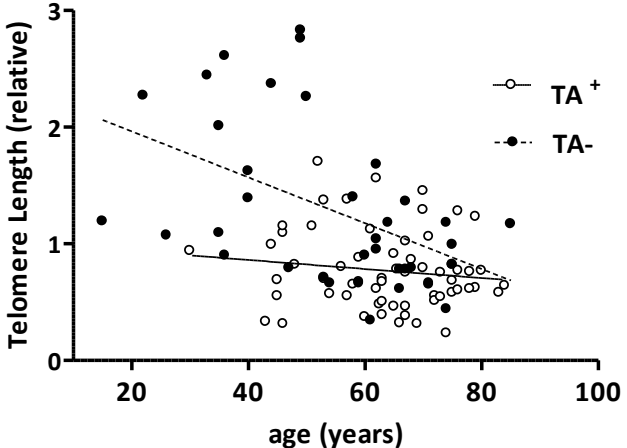

Supplement: supp_nos329_nos329supp.pdf [file supp_nos329_nos329supp.pdf]
